# Supplementary material for: Inhibition of Rac1 activity by controlled release of NSC23766 from chitosan microspheres effectively ameliorates osteoarthritis development in vivo
Source: HighWire-hosted journal article supplement (doi:10.1136/annrheumdis-2013-203901), 2013-11-21

## Supplementary Figures

Figure S1 Safranin O staining of 6 new joints of group GFP/CA-Rac1/DN-Rac1. Scale bars, 200 $\mu$ m.

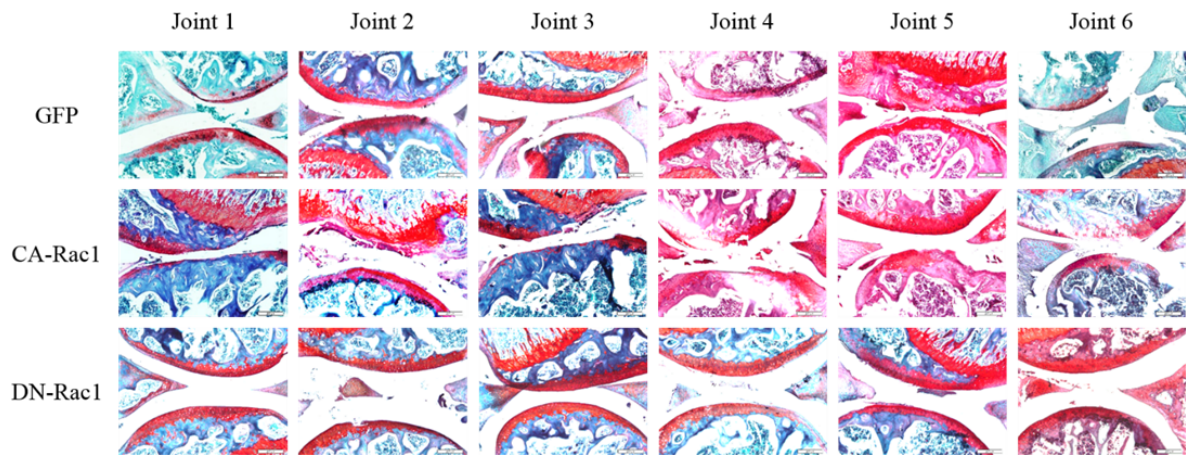

Figure S2 Safranin O staining of 6 new joints of group PBS/NSC at 4 and 6 weeks. Scale bars, 200 $\mu$ m.

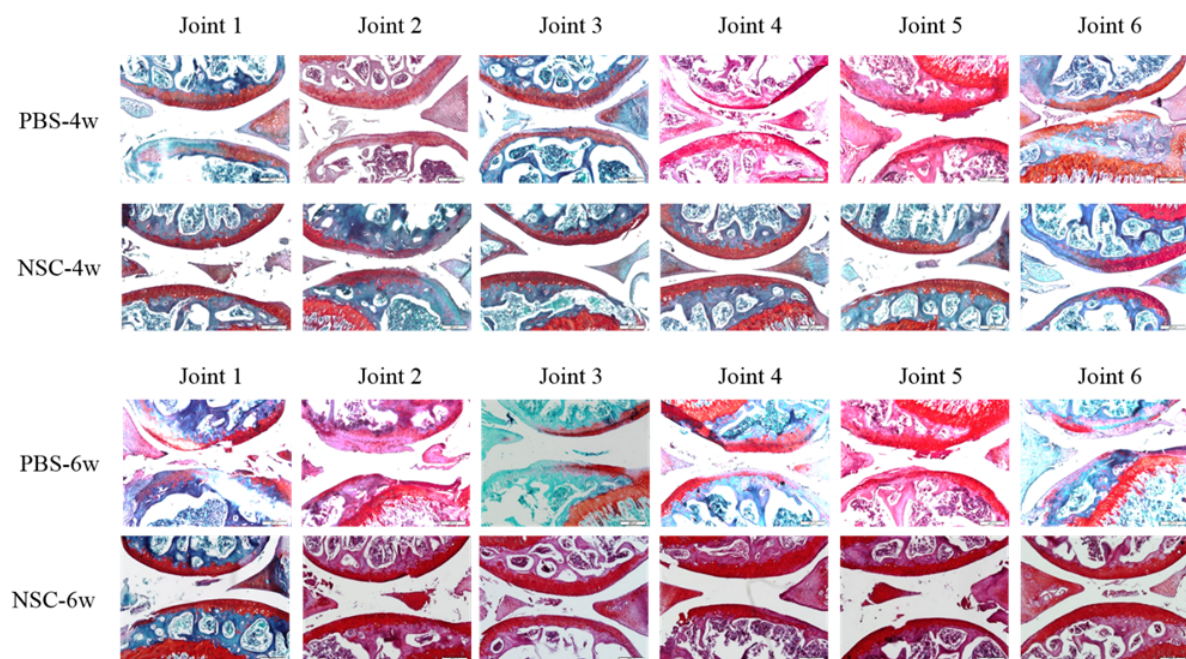

Figure S3 Safranin O staining of 6 new joints of group CM/CM+NSC at 4 and 6 weeks. Scale bars, 200 $\mu$ m.

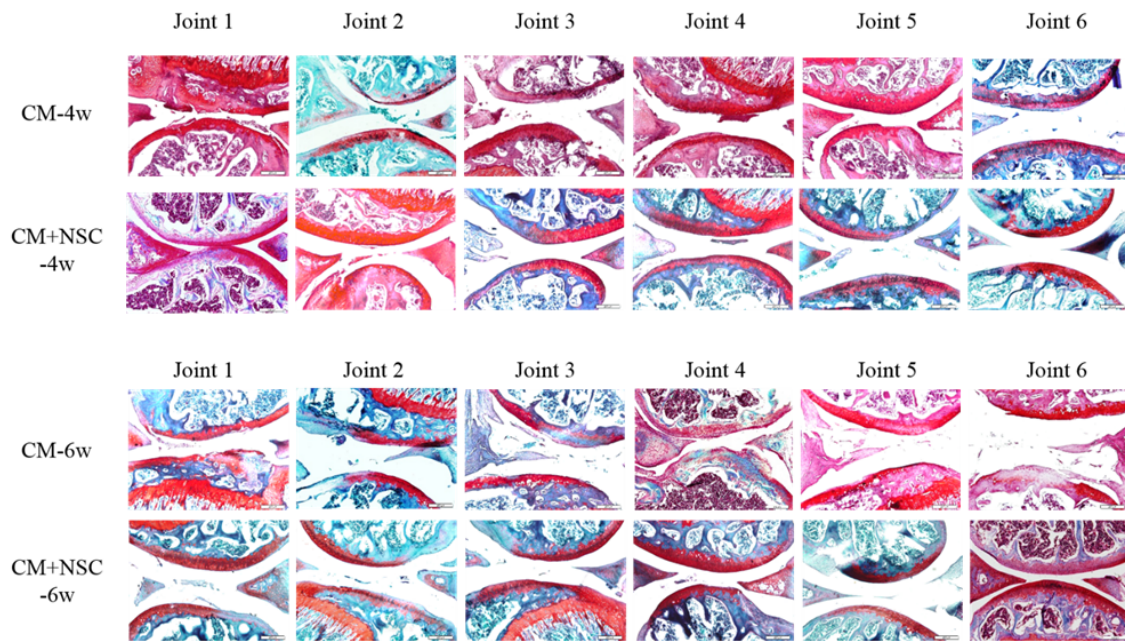

Supplement: annrheumdis-2013-203901supp.pdf [file annrheumdis-2013-203901supp.pdf]
